# Supplementary material for: Photoelectrochemical NADH regeneration on a polymer semiconductor-based photocathode
Source: Royal Society of Chemistry journal article supplement (doi:10.1039/d3gc00559c), 2023-01-01
Supplement: d3gc00559c1.pdf [file d3gc00559c1.pdf]

## Supporting Information

### Photoelectrochemical NADH regeneration on a polymer semiconductor-based photocathode

Nanxin Li <sup>a</sup>, Jia You <sup>a</sup>, Lanlan Huang <sup>b</sup>, Haoran Zhang <sup>a</sup>, Xianlong Wang <sup>a</sup>, Lihua He <sup>a</sup>,  
Chunli Gong <sup>b</sup>, Shiwei Lin <sup>a\*</sup>, Bingging Zhang <sup>a, b, \*</sup>

<sup>a</sup> State Key Laboratory of Marine Resource Utilization in South China Sea, School of  
Materials Science and Engineering, Hainan University, Haikou 570228, China

<sup>b</sup> School of Chemistry and Materials Science, Hubei Engineering University, Xiaogan  
432000, China

\*Corresponding authors.

E-mail addresses: bqzhang@hainanu.edu.cn; linsw@hainanu.edu.cn

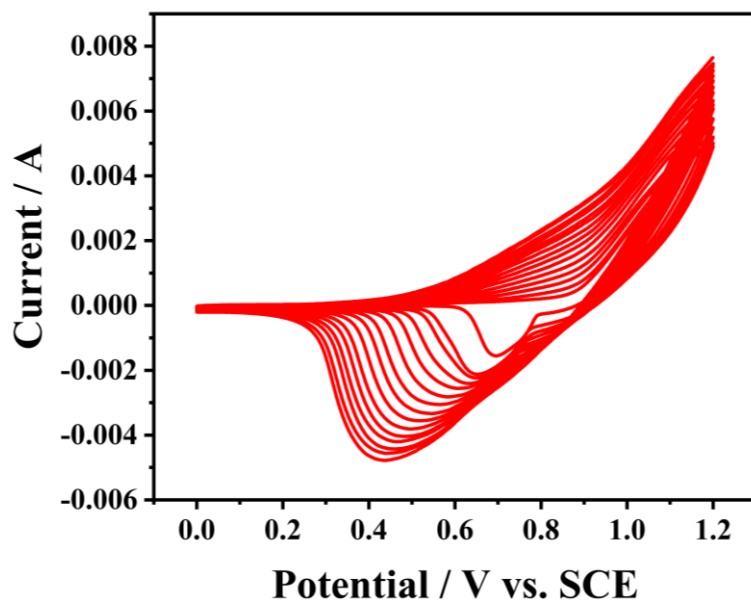

**Fig. S1** Cyclic voltammetry deposition of pTTh on carbon paper (CP) electrode in acetonitrile solution containing 10 mM TTh and 0.1 M LiClO<sub>4</sub>, the scan rate is 25 mV s<sup>-1</sup>.

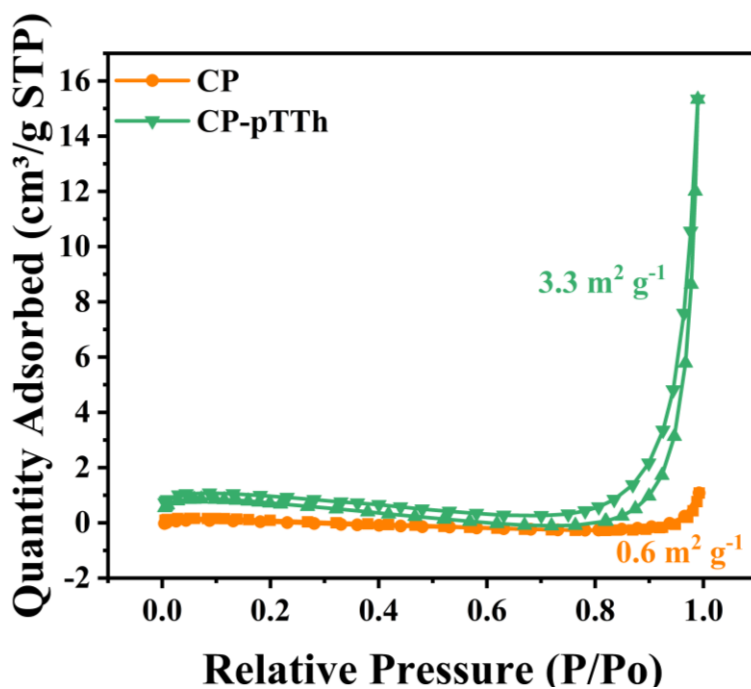

**Fig. S2** N<sub>2</sub> adsorption–desorption isothermal analysis of CP-pTTh and CP.

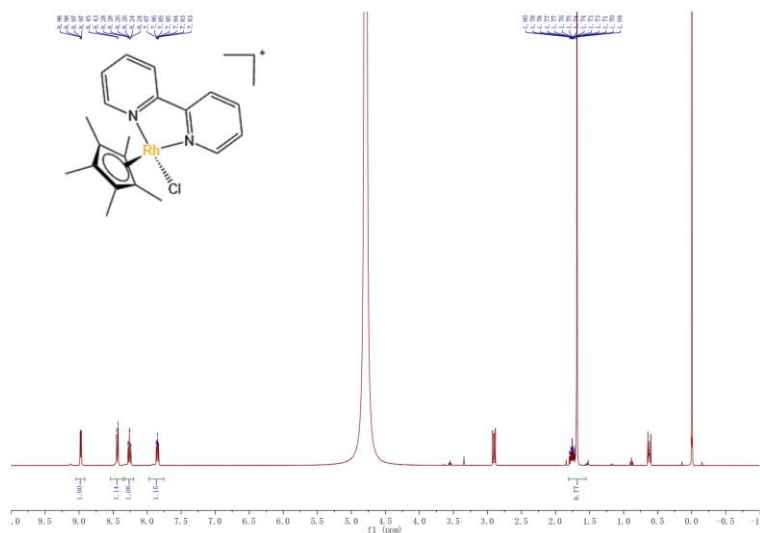

**Fig. S3**  $^1\text{H NMR}$  ( $\text{D}_2\text{O}$ ) spectrum of  $[\text{Cp}^*\text{Rh}(\text{bpy})\text{Cl}]^+$ .

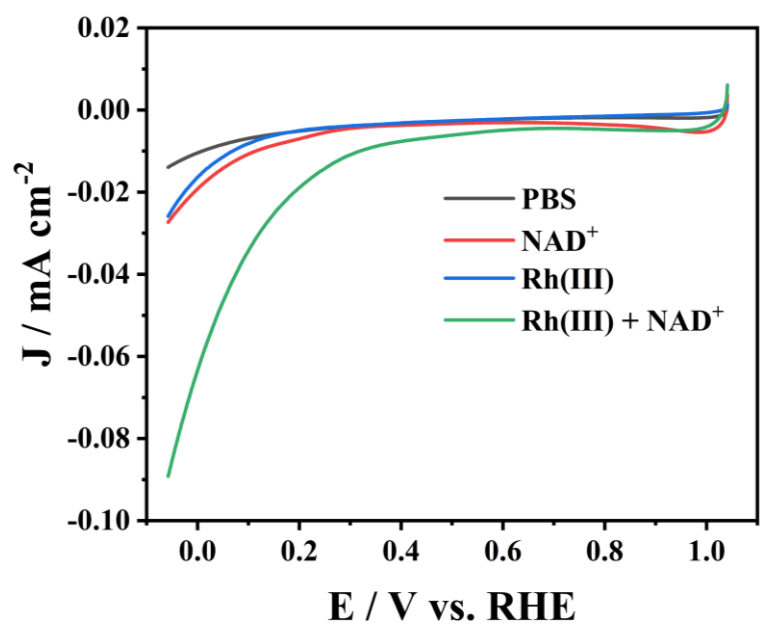

**Fig. S4** LSV curves of the  $\text{NAD}^+$  reduction on pTTh electrode in the dark.

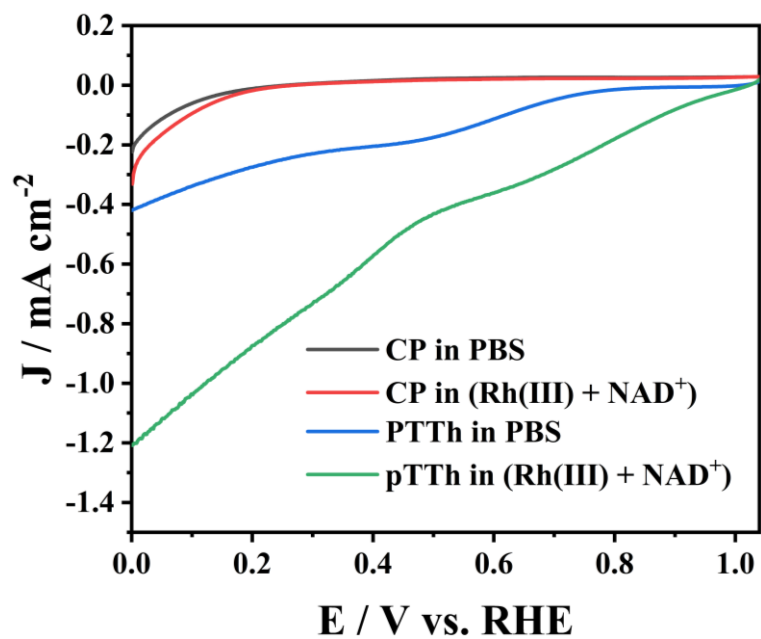

**Fig. S5** LSV curves recorded in  $\text{N}_2$ -saturated  $\text{NAD}^+$  and  $\text{Rh(III)}$  contained PBS solution on carbon paper and pTTh.

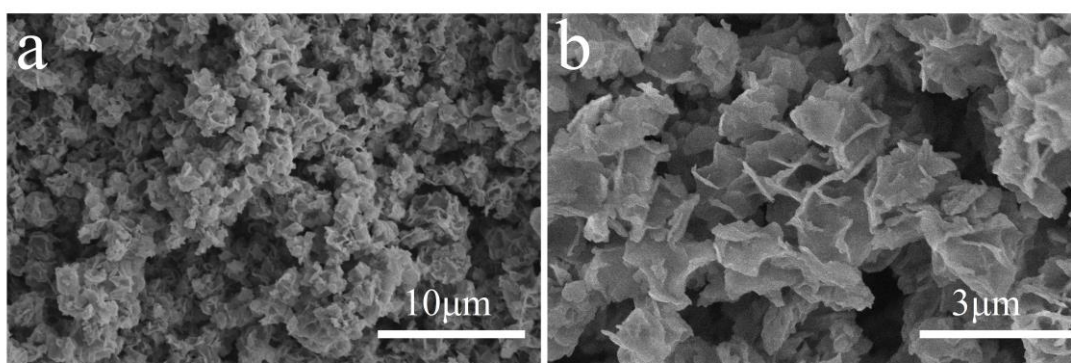

**Fig. S6** (a, b) SEM images of pTTh after 3 h regeneration.

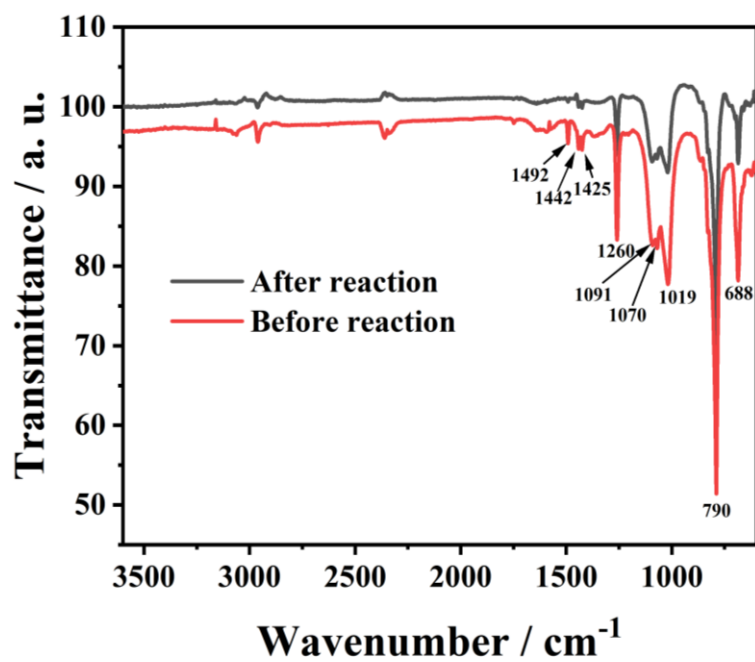

Fig. S7 FT-IR spectra of pTTh before and after 3 h regeneration.

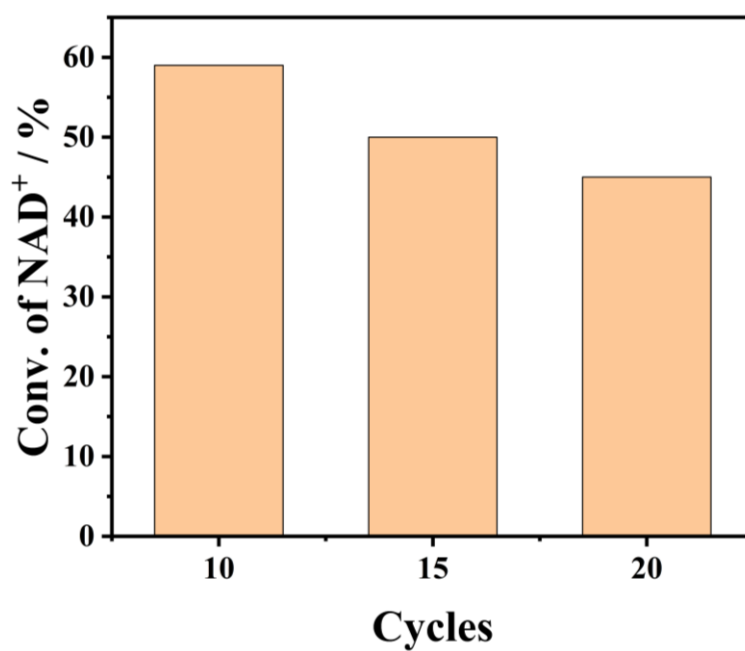

Fig. S8 The yield of 1,4-NADH on pTTh electrodes synthesized with different number of CV electrodeposition cycles.
